# Supplementary material for: Ancestral acetylcholine receptor β-subunit forms homopentamers that prime before opening spontaneously
Source: eLife journal article supplement (doi:10.7554/elife.76504), 2022-06-23
Supplement: supp [file elife-76504-supp-v1.zip]

**A**

Three-state linear (main text)

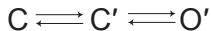

Open

Closed

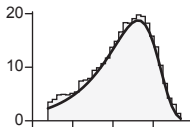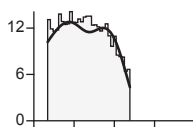**B**

Three-state linear (alternate)

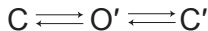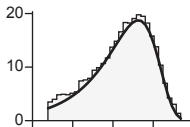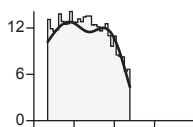**C**

Three-state cyclic

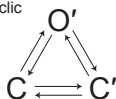
 $\sqrt{\text{Events} / \text{Bin}}$ 
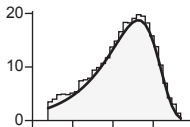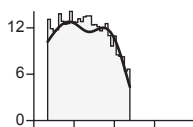**D**

Two-state

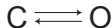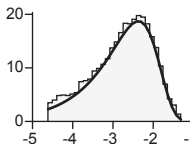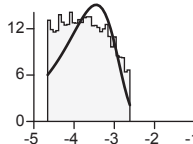

log Duration (s)
