# Supplementary figures and images for: Ancestral acetylcholine receptor β-subunit forms homopentamers that prime before opening spontaneously
Source: eLife journal article supplement (doi:10.7554/elife.76504), 2022-06-23

**A**

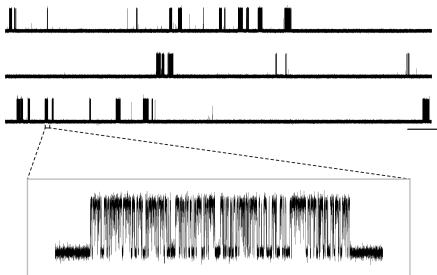

**B**

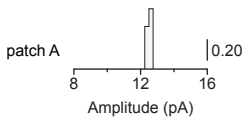

Supplement: supp [file elife-76504-supp-v1.zip]

**A**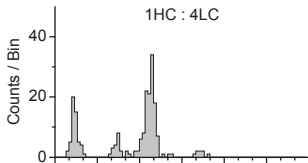**B**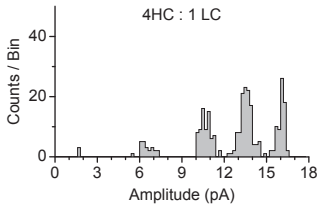

Supplement: supp [file elife-76504-supp-v1.zip]

**A**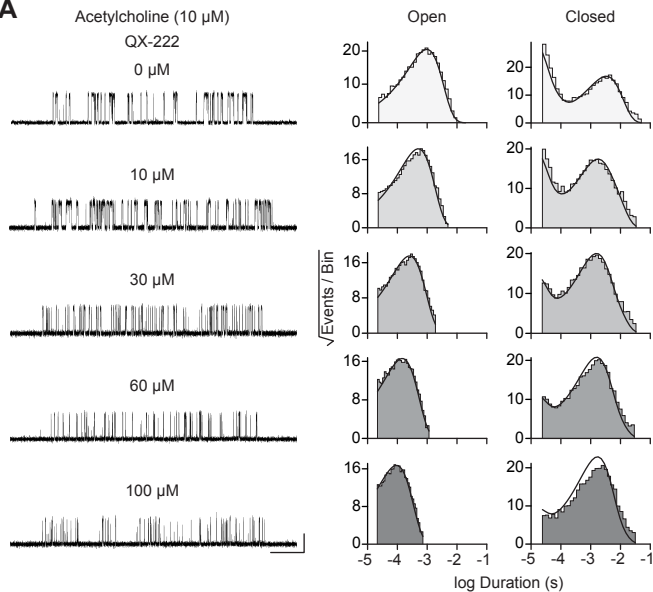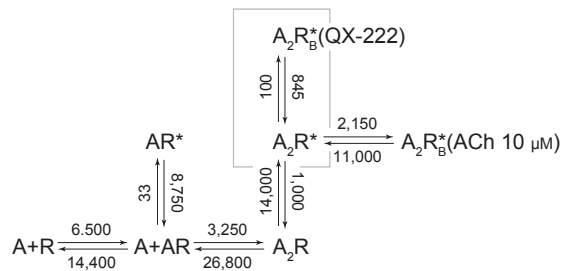**B**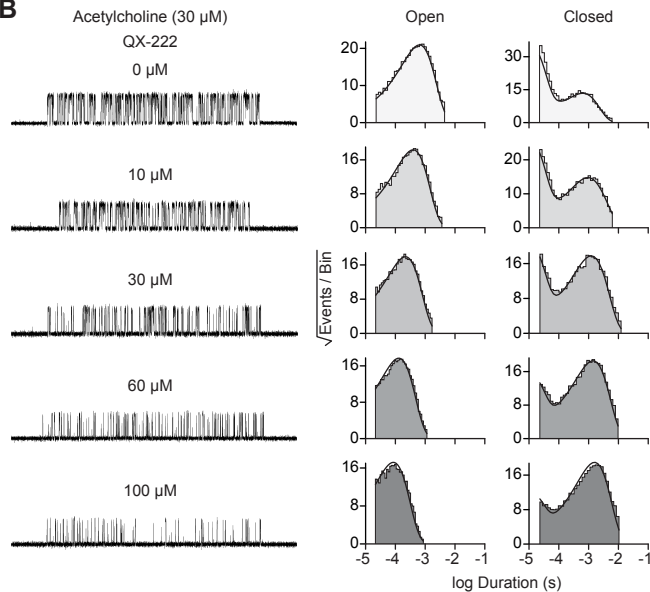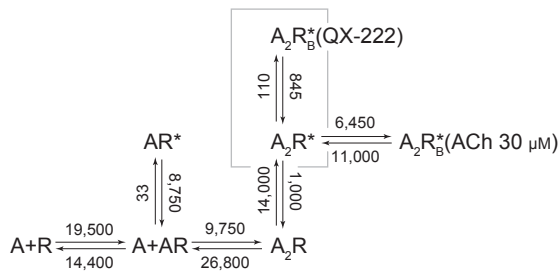

Supplement: supp [file elife-76504-supp-v1.zip]

**A**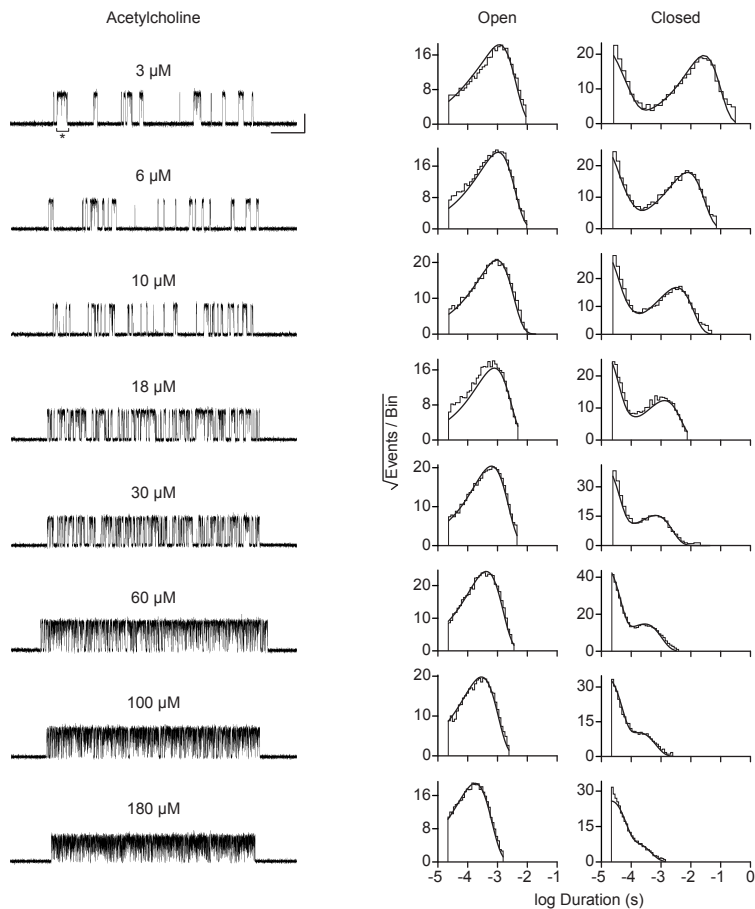**B**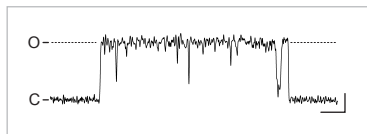**C**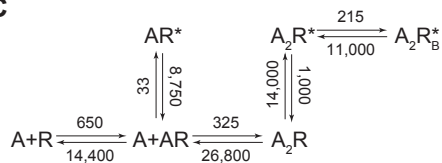

Supplement: supp [file elife-76504-supp-v1.zip]
